# Supplementary material
Source: ML conference proceedings conference paper supplement (https://proceedings.mlr.press/v130/cai21a.html)
Supplement: Supplementary file 1 [file cai21a-supp.pdf]

## Supplementary Materials

### 5 Preliminary

In this section, we present some preliminary results that will be used in subsequent proofs.

The following lemma is the well-known Weyl theorem (Stewart and Sun, 1990, p.203).

**Lemma 5.1.** *For two Hermitian matrices  $A, \tilde{A} \in \mathbb{C}^{n \times n}$ , let  $\lambda_1 \leq \dots \leq \lambda_n, \tilde{\lambda}_1 \leq \dots \leq \tilde{\lambda}_n$  be eigenvalues of  $A, \tilde{A}$ , respectively. Then*

$$|\lambda_j - \tilde{\lambda}_j| \leq \|A - \tilde{A}\|, \quad \text{for } 1 \leq j \leq n.$$

The following lemma gives some fundamental results for  $\sin \Theta(U, V)$ , which can be easily verified via definition.

**Lemma 5.2.** *Let  $[U, U_c]$  and  $[V, V_c]$  be two orthogonal matrices with  $U \in \mathbb{R}^{n \times k}, V \in \mathbb{R}^{n \times \ell}$ . Then*

$$\|\sin \Theta(U, V)\| = \|U_c^\top V\| = \|U^\top V_c\|.$$

The following lemma discusses the perturbation bound for the roots of a third order equation.

**Lemma 5.3.** *Given a perturbed third order equation  $t^3 + (p + \epsilon)t + q = 0$ , where  $p, q \in \mathbb{R}$  and  $\epsilon \in \mathbb{R}$  is a small perturbation. Denote the roots of  $t^3 + pt + q = 0$  by  $t_1, t_2, t_3$ , and assume that the multiplicity of each root is no more than two. Then the roots of  $t^3 + (p + \epsilon)t + q = 0$  lie in  $\cup_{i=1}^3 \{z \in \mathbb{C} \mid |z - t_i| \leq r\}$ , where  $r = O(\sqrt{\epsilon})$ .*

*Proof.* Let the roots of  $t^3 + (p + \epsilon)t + q = 0$  be  $\tilde{t}_1, \tilde{t}_2, \tilde{t}_3$ . Notice that  $t_1, t_2$  and  $t_3$  are the eigenvalues of  $A = \begin{bmatrix} 0 & 1 & 0 \\ 0 & 0 & 1 \\ -q & -p & 0 \end{bmatrix}$ ,  $\tilde{t}_1, \tilde{t}_2, \tilde{t}_3$  are the eigenvalues of  $\tilde{A} = \begin{bmatrix} 0 & 1 & 0 \\ 0 & 0 & 1 \\ -q & -p - \epsilon & 0 \end{bmatrix}$ . Since the multiplicity of  $t_i$  is no more than two, the size of each diagonal block of the Jordan canonical form of  $A$  is no more than two. Using Kahan et al. (1982, Theorem 8), we know that for each  $\tilde{t}_i$ , there exists a  $t_j$  such that

$$\frac{|\tilde{t}_i - t_j|^s}{1 + |\tilde{t}_i - t_j|^{s-1}} \leq O(1) \left\| \begin{bmatrix} 0 & 0 & 0 \\ 0 & 0 & 0 \\ 0 & \epsilon & 0 \end{bmatrix} \right\| = O(\epsilon), \quad (11)$$

where  $s = 1$  or  $2$ . Therefore,  $|\tilde{t}_i - t_j| \leq O(\sqrt{\epsilon})$ . The conclusion follows.  $\square$

## 6 Proofs

In this section, we present the proofs of the theoretical results in the paper.

### 6.1 Proof of Theorem 2.1

**Theorem 2.1.** Let  $(\tau_p, A)$  be a solution to BJBPD for  $\mathcal{C}$ . Then  $\mathcal{R}(A) = \mathcal{N}(\underline{\mathcal{C}})^\perp = \mathcal{R}(\underline{\mathcal{C}}^\top)$ .

*Proof.* Using (1), for any  $v \in \mathcal{N}(A^\top)$ , we have  $C_i x = A \Sigma_i A^\top x = 0$ , similarly,  $C_i^\top x = 0$ . Therefore,  $\mathcal{N}(A^\top) \subset \mathcal{N}(\underline{\mathcal{C}})$ .

Next, we show  $\sigma_p(\underline{\mathcal{C}}) > 0$  by contradiction. If  $\sigma_p(\underline{\mathcal{C}}) = 0$ , there exists a nonzero vector  $v \notin \mathcal{N}(A^\top)$  such that  $\underline{\mathcal{C}}v = 0$ . Let  $w = A^\top v$ , we know that  $w \neq 0$ . Partition  $w$  as  $w = [w_1^\top, \dots, w_\ell^\top]^\top$ , where  $w_j \in \mathbb{R}^{p_j}$  for  $j = 1, \dots, \ell$ . Then there at least exists one  $w_j \neq 0$ . Without loss of generality, assume  $w_1 \neq 0$ . It follows from  $\underline{\mathcal{C}}v = 0$  that

$$0 = C_i v = A \Sigma_i A^\top v = A \Sigma_i w = A \begin{bmatrix} \Sigma_i^{(11)} w_1 \\ \vdots \\ \Sigma_i^{(\ell\ell)} w_\ell \end{bmatrix}. \quad (12)$$

Therefore, we have  $\Sigma_i^{(11)} w_1 = 0$  for all  $i$ . Similarly,  $w_1^\top \Sigma_i^{(11)} = 0$  for all  $i$ . Let  $w_1^c \in \mathbb{R}^{p_1 \times (p_1-1)}$  be such that  $[w_1, w_1^c]$  be nonsingular, then

$$[w_1, w_1^c]^\top \Sigma_i^{(11)} [w_1, w_1^c] = \begin{bmatrix} 0 & 0 \\ 0 & * \end{bmatrix}, \quad \text{for } i = 1, \dots, m,$$

i.e.,  $\mathcal{C}_1 = \{\Sigma_i^{(11)}\}_{i=1}^m$  can be further block diagonalized, which contradicts with the assumption that  $(\tau_p, A)$  is a solution to the BJB DP.

Now we have  $\dim(\mathcal{N}(\underline{\mathcal{C}})) \leq d - p$ . Combining it with  $\dim(\mathcal{N}(A^\top)) = d - p$  and  $\mathcal{N}(A^\top) \subset \mathcal{N}(\underline{\mathcal{C}})$ , we have  $\mathcal{N}(A^\top) = \mathcal{N}(\underline{\mathcal{C}})$ . Then it follows that

$$\mathcal{R}(A) = \mathcal{N}(A^\top)^\perp = \mathcal{N}(\underline{\mathcal{C}})^\perp = \mathcal{R}(\underline{\mathcal{C}}^\top)$$

This completes the proof.  $\square$

## 6.2 Proof of Theorem 2.2

**Theorem 2.2.** Let  $(\tau_p, A)$  be a solution to BJB DP for  $\mathcal{C}$ . Let the columns of  $V_2$  be an orthonormal basis for  $\mathcal{N}(A^\top)$ ,  $\phi_1 \geq \dots \geq \phi_d$  and  $\tilde{\phi}_1 \geq \dots \geq \tilde{\phi}_d$  be the singular values of  $\underline{\mathcal{C}}$  and  $\tilde{\underline{\mathcal{C}}}$ , respectively. Then

$$\tilde{\phi}_p \geq \phi_p - \|\underline{E}\|, \quad \tilde{\phi}_{p+1} \leq \|\underline{E}\|. \quad (13)$$

In addition, let  $\tilde{U}_1 = [\tilde{u}_1, \dots, \tilde{u}_p]$ ,  $\tilde{V}_1 = [\tilde{v}_1, \dots, \tilde{v}_p]$ , where  $\tilde{u}_j, \tilde{v}_j$  are the left and right singular vector of  $\tilde{\underline{\mathcal{C}}}$  corresponding to  $\tilde{\phi}_j$ , respectively, and  $\tilde{U}_1, \tilde{V}_1$  are both orthonormal. If  $\|\underline{E}\| < \frac{\phi_p}{2}$ , then

$$\|\sin \Theta(\mathcal{R}(A), \mathcal{R}(\tilde{V}_1))\| \leq \frac{\|\tilde{U}_1^\top \underline{E} V_2\|}{\tilde{\phi}_p}.$$

*Proof.* First, by Theorem 2.1, we know that  $\phi_{p+1} = \dots = \phi_d = 0$ . On the other hand, by Lemma 5.1, we have

$$|\tilde{\phi}_j - \phi_j| \leq \|\tilde{\underline{\mathcal{C}}} - \underline{\mathcal{C}}\| = \|\underline{E}\|, \quad \text{for } j = 1, \dots, d.$$

Then (2) follows.

Second, using (2) and  $\|\underline{E}\| < \frac{\phi_p}{2}$ , we have  $\tilde{\phi}_p \geq \phi_p - \|\underline{E}\| > \frac{\phi_p}{2} > \|\underline{E}\| \geq \tilde{\phi}_{p+1}$ . Thus,  $\mathcal{R}(\tilde{V}_1)$  is well defined. By calculations, we have

$$\text{diag}(\tilde{\phi}_1, \dots, \tilde{\phi}_p) \tilde{V}_1^\top V_2 \stackrel{(a)}{=} \tilde{U}_1^\top \tilde{\underline{\mathcal{C}}} V_2 = \tilde{U}_1^\top (\underline{\mathcal{C}} + \underline{E}) V_2 \stackrel{(b)}{=} \tilde{U}_1^\top \underline{E} V_2,$$

where (a) uses  $\text{diag}(\tilde{\phi}_1, \dots, \tilde{\phi}_p) \tilde{V}_1^\top = \tilde{U}_1^\top \tilde{\underline{\mathcal{C}}}$ , (b) uses  $\underline{\mathcal{C}} V_2 = 0$ . Then using Lemma 5.2, we get

$$\|\sin \Theta(\mathcal{R}(A), \mathcal{R}(\tilde{V}_1))\| = \|\tilde{V}_1^\top V_2\| = \|\text{diag}(\tilde{\phi}_1, \dots, \tilde{\phi}_p)^{-1} \tilde{U}_1^\top \underline{E} V_2\| \leq \frac{\|\tilde{U}_1^\top \underline{E} V_2\|}{\tilde{\phi}_p}.$$

The proof is completed.  $\square$

## 6.3 Proof of Theorem 2.3

**Theorem 2.3.** Given  $\mathcal{C} = \{C_i\}_{i=1}^m$  with  $C_i \in \mathbb{R}^{d \times d}$ . Let  $V_1 \in \mathbb{R}^{d \times p}$  be such that  $V_1^\top V_1 = I_p$ ,  $\mathcal{R}(V_1) = \mathcal{R}(\underline{\mathcal{C}}^\top)$ . Denote  $B_i = V_1^\top C_i V_1$ ,  $\mathcal{B} = \{B_i\}_{i=1}^m$ . Then  $C_i$ 's can be factorized as in (1) with  $\mathcal{R}(A) = \mathcal{R}(\underline{\mathcal{C}}^\top)$  if and only if there exists a matrix  $X \in \mathcal{N}(\mathcal{B})$ , which can be factorized into

$$X = Y \text{diag}(X_{11}, \dots, X_{\ell\ell}) Y^{-1}, \quad (14)$$

where  $Y \in \mathbb{R}^{p \times p}$  is nonsingular,  $X_{jj} \in \mathbb{R}^{p_j \times p_j}$  for  $1 \leq j \leq \ell$  and  $\lambda(X_{jj}) \cap \lambda(X_{kk}) = \emptyset$  for  $j \neq k$ .

*Proof.* ( $\Rightarrow$ ) (Sufficiency) Let  $W = A^\top V_1$ . Since  $\mathcal{R}(\underline{C}^\top) = \mathcal{R}(A) = \mathcal{R}(V_1)$ , and  $V_1, A$  both have full column rank, we know that  $W$  is nonsingular. Let

$$X = W^{-1}\Gamma W = W^{-1} \text{diag}(\gamma_1 I_{p_1}, \dots, \gamma_\ell I_{p_\ell})W, \quad (15)$$

where  $\gamma_1, \dots, \gamma_\ell$  be  $\ell$  distinct real numbers. For all  $1 \leq i \leq m$ , we have

$$B_i X \stackrel{(a)}{=} W^\top \Sigma_i W W^{-1} \Gamma W = W^\top \Sigma_i \Gamma W = W^\top \Gamma \Sigma_i W = W^\top \Gamma W^{-\top} W^\top \Sigma_i W \stackrel{(b)}{=} X^\top B_i,$$

where both (a) and (b) use  $W = A^\top V_1$ , (1) and (15). Therefore,  $X \in \mathcal{N}(\mathcal{B})$ , and it is of form (3).

( $\Leftarrow$ ) (Necessity) Substituting (3) into  $B_i X = X^\top B_i$ , we get

$$B_i Y \text{diag}(X_{11}, \dots, X_{\ell\ell}) Y^{-1} = Y^{-\top} \text{diag}(X_{11}^\top, \dots, X_{\ell\ell}^\top) Y^\top B_i. \quad (16)$$

Partition  $Y^\top B_i Y = [\Sigma_i^{(jk)}]$  with  $\Sigma_i^{(jk)} \in \mathbb{R}^{p_j \times p_k}$ , then it follows from (16) that

$$\Sigma_i^{(jk)} X_{kk} = X_{jj}^\top \Sigma_i^{(jk)}, \quad \text{for } j, k = 1, 2, \dots, \ell. \quad (17)$$

Consequently, for  $j \neq k$ , we know that  $\Sigma_i^{(jk)} = 0$  since  $\lambda(X_{jj}) \cap \lambda(X_{kk}) = \emptyset$ . Then we know that

$$V_1^\top C_i V_1 = B_i = Y^{-\top} \Sigma_i Y^{-1}, \quad (18)$$

where  $\Sigma_i = \text{diag}(\Sigma_i^{(11)}, \dots, \Sigma_i^{(\ell\ell)})$ . Using  $\mathcal{R}(\underline{C}^\top) = \mathcal{R}(V_1)$ , we know that  $\mathcal{R}(C_i) \subset \mathcal{R}(V_1)$  and  $\mathcal{R}(C_i^\top) \subset \mathcal{R}(V_1)$ . Then it follows from (18) that

$$C_i = V_1 Y^{-\top} \Sigma_i Y^{-1} V_1^\top.$$

Set  $A = V_1 Y^{-\top}$ , the conclusion follows immediately.  $\square$

#### 6.4 Proof of Theorem 2.4

**Theorem 2.4.** Let  $(\tau_p, A)$  be a solution to the BJBPD for  $\mathcal{C}$ , i.e., (1) holds. Then the BJBPD for  $\mathcal{C}$  is uniquely  $\tau_p$ -block-diagonalizable if and only if both **(P1)** and **(P2)** hold.

*Proof.* ( $\Rightarrow$ ) (Sufficiency) First, we show **(P1)** by contradiction. If **(P1)** doesn't hold, there exists  $\Gamma_{jj} \in \mathbb{R}^{p_j \times p_j}$  such that  $\text{vec}(\Gamma_{jj}) \in \mathcal{N}(G_{jj})$  and a nonsingular  $W_j \in \mathbb{R}^{p_j \times p_j}$  such that

$$\Gamma_{jj} = W_j \text{diag}(\Gamma_{jj}^{(1)}, \Gamma_{jj}^{(2)}) W_j^{-1}, \quad (19)$$

where  $\Gamma_{jj}^{(1)}$  and  $\Gamma_{jj}^{(2)}$  are two real matrices and  $\lambda(\Gamma_{jj}^{(1)}) \cap \lambda(\Gamma_{jj}^{(2)}) = \emptyset$ . Using  $\text{vec}(\Gamma_{jj}) \in \mathcal{N}(G_{jj})$ , we have

$$\Sigma_i^{(jj)} \Gamma_{jj} - \Gamma_{jj}^\top \Sigma_i^{(jj)} = 0, \quad \text{for } 1 \leq i \leq m. \quad (20)$$

Substituting (19) into (20), we get

$$\widetilde{\Sigma}_i^{(jj)} \text{diag}(\Gamma_{jj}^{(1)}, \Gamma_{jj}^{(2)}) - \text{diag}(\Gamma_{jj}^{(1)}, \Gamma_{jj}^{(2)})^\top \widetilde{\Sigma}_i^{(jj)} = 0, \quad \text{for } 1 \leq i \leq m. \quad (21)$$

where  $\widetilde{\Sigma}_i^{(jj)} = W_j^\top \Sigma_i^{(jj)} W_j$ . Similar to the proof of necessity for Theorem 2.3, using  $\lambda(\Gamma_{jj}^{(1)}) \cap \lambda(\Gamma_{jj}^{(2)}) = \emptyset$ , we have  $\widetilde{\Sigma}_i^{(jj)}$  for  $1 \leq i \leq m$  are all block diagonal matrices. In other words,  $C_i$ 's can be simultaneously block diagonalizable with more than  $\ell$  blocks. This contradicts with the fact  $(\tau_p, A)$  is the solution to the BJBPD.

Next, we show **(P2)**, also by contradiction. Since  $G_{jk}$  is rank deficient, then there exist two matrices  $\Gamma_{jk}, \Gamma_{kj}$ , which are not zero at the same time, such that (4b) holds, i.e.,

$$\begin{bmatrix} \Sigma_i^{(jj)} & 0 \\ 0 & \Sigma_i^{(kk)} \end{bmatrix} \begin{bmatrix} 0 & \Gamma_{jk} \\ \Gamma_{kj} & 0 \end{bmatrix} - \begin{bmatrix} 0 & \Gamma_{kj}^\top \\ \Gamma_{jk}^\top & 0 \end{bmatrix} \begin{bmatrix} \Sigma_i^{(jj)} & 0 \\ 0 & \Sigma_i^{(kk)} \end{bmatrix} = 0. \quad (22)$$

Since  $\begin{bmatrix} 0 & \Gamma_{jk} \\ \Gamma_{kj} & 0 \end{bmatrix} \neq 0$ , it has at least a nonzero eigenvalue. Now let  $\lambda$  be a nonzero eigenvalue of  $\begin{bmatrix} 0 & \Gamma_{jk} \\ \Gamma_{kj} & 0 \end{bmatrix}$ , and  $\begin{bmatrix} x \\ y \end{bmatrix}$  be the corresponding eigenvector. Then it is easy to see that  $-\lambda$  is also an eigenvalue, and the corresponding eigenvector is  $\begin{bmatrix} -x \\ y \end{bmatrix}$ . In addition,  $x \neq 0$  and  $y \neq 0$ . Therefore, there exists a nonsingular matrix  $W_{jk}$ , which is not  $(p_j, p_k)$ -block diagonal, such that

$$\begin{bmatrix} 0 & \Gamma_{jk} \\ \Gamma_{kj} & 0 \end{bmatrix} = W_{jk} \begin{bmatrix} \Upsilon & 0 & 0 \\ 0 & -\Upsilon & 0 \\ 0 & 0 & 0 \end{bmatrix} W_{jk}^{-1}, \quad (23)$$

where  $\Upsilon$  is nonsingular,  $\lambda(\Upsilon) \cap \lambda(-\Upsilon) = \emptyset$  and  $W_{jk}$  is not  $(p_j, p_k)$ -block diagonal. Plugging (23) into (22), similar to the proof of necessity for Theorem 2.3, we can show that  $W_{jk}^\top \begin{bmatrix} \Sigma_i^{(jj)} & 0 \\ 0 & \Sigma_i^{(kk)} \end{bmatrix} W_{jk}$  for all  $1 \leq i \leq m$  are all block diagonal. For the ease of notation, let  $j = 1, k = 2$ . Denote  $\widehat{A} = A \text{diag}(W_{12}^{-\top}, I_{p_3}, \dots, I_{p_\ell})$ . We know that  $A, \widehat{A}$  are not equivalent since  $W_{12}$  is not  $(p_1, p_2)$ -block diagonal. This contradicts with the assumption that BJBDF for  $\mathcal{C}$  is uniquely  $\tau_p$ -block-diagonalizable, completing the proof of sufficiency.

( $\Leftarrow$ ) (Necessity) Let  $(\tau_p, A)$  and  $(\widehat{\tau}_{\widehat{p}}, \widehat{A})$  be two solutions to the BJBDF for  $\mathcal{C}$ , i.e., it holds that

$$C_i = A \Sigma_i A^\top = \widehat{A} \widehat{\Sigma}_i \widehat{A}^\top, \quad (24)$$

where  $\Sigma_i$ 's are all  $\tau_p$ -block diagonal,  $\widehat{\Sigma}_i$ 's are all  $\widehat{\tau}_{\widehat{p}}$ -block-diagonal. It suffices if we can show that  $(\tau_p, A)$  and  $(\widehat{\tau}_{\widehat{p}}, \widehat{W})$  are equivalent.

Let  $\tau_p = (p_1, \dots, p_\ell)$ ,  $\widehat{\tau}_{\widehat{p}} = (\widehat{p}_1, \dots, \widehat{p}_\ell)$ . As  $(\tau_p, A)$  and  $(\widehat{\tau}_{\widehat{p}}, \widehat{W})$  are both solutions, it holds that  $\ell = \widehat{\ell}$ . By Theorem 2.1, we know that  $\mathcal{R}(\mathcal{C}^\top) = \mathcal{R}(A) = \mathcal{R}(\widehat{A})$ . Since  $A$  and  $\widehat{A}$  are both of full column rank, we know that  $p = \widehat{p}$  and there exists nonsingular matrix  $Z$  such that  $\widehat{A} = AY^{-\top}$ . Then it follows from (24) that

$$\widehat{\Sigma}_i = Y^\top \Sigma_i Y, \quad \text{for } 1 \leq i \leq m. \quad (25)$$

Let  $\Gamma = Y \text{diag}(\gamma_1 I_{\widehat{p}_1}, \dots, \gamma_\ell I_{\widehat{p}_\ell}) Y^{-1}$ , where  $\gamma_1, \dots, \gamma_\ell$  are distinct real numbers. Using (25), we have

$$\Sigma_i \Gamma = Y^{-\top} (Y^\top \Sigma_i Y) \text{diag}(\gamma_j I_{\widehat{p}_j}) Y^{-1} = Y^{-\top} \text{diag}(\gamma_j I_{\widehat{p}_j}) (Y^\top \Sigma_i Y) Y^{-1} = \Gamma^\top \Sigma_i, \quad (26)$$

i.e.,  $\Gamma \in \mathcal{N}(\{\Sigma_i\})$ .

Partition  $\Gamma = [\Gamma_{jk}]$  with  $\Gamma_{jk} \in \mathbb{R}^{p_j \times p_k}$ . Recall (4) and (5), by (P2), we have  $\Gamma_{jk} = 0$  for  $j \neq k$ , i.e.,  $\Gamma$  is  $\tau_p$ -block diagonal; using (P1),  $\Gamma = Y \text{diag}(\gamma_j I_{\widehat{p}_j}) Y^{-1}$  and  $\cup_{j=1}^\ell \lambda(\Gamma_{jj}) = \lambda(\Gamma)$ , we know that  $\lambda(\Gamma_{k_j k_j}) = \lambda(\gamma_j I_{\widehat{p}_j})$  for  $1 \leq j \leq \ell$ , where  $\{k_1, k_2, \dots, k_\ell\}$  is a permutation of  $\{1, 2, \dots, \ell\}$ . Thus,  $\widehat{p}_j = p_{k_j}$  for  $1 \leq j \leq \ell$ . In other words, there exists a permutation  $\Pi_\ell \in \mathbb{R}^{\ell \times \ell}$  such that  $\widehat{\tau}_p = \tau_p \Pi_\ell$ . Let  $\Pi \in \mathbb{R}^{p \times p}$  be the permutation matrix associated with  $\Pi_\ell$ . Then

$$\text{diag}(\gamma_1 I_{p_{k_1}}, \dots, \gamma_\ell I_{p_{k_\ell}}) = \Pi^\top \text{diag}(\gamma'_1 I_{p_1}, \dots, \gamma'_\ell I_{p_\ell}) \Pi. \quad (27)$$

where  $\gamma'_j$  is the eigenvalue of  $\Gamma_{jj}$ . Then it follows that

$$\text{diag}(\Gamma_{11}, \dots, \Gamma_{\ell\ell}) = Y \Pi^\top \text{diag}(\gamma'_1 I_{p_1}, \dots, \gamma'_\ell I_{p_\ell}) (Y \Pi^\top)^{-1}. \quad (28)$$

Noticing that the columns of  $Y \Pi^\top$  are eigenvectors of  $\Gamma$ , we know that  $Y \Pi^\top$  is  $\tau_p$ -block-diagonal. Therefore, we can rewrite  $\widehat{A} = AY^{-\top}$  as  $\widehat{A} = A(Y \Pi^\top)^{-\top} \Pi$ , in which  $(Y \Pi^\top)^{-\top}$  is  $\tau_p$ -block-diagonal,  $\Pi$  is the permutation matrix associated with  $\Pi_\ell$ . So,  $(\tau_p, A)$  and  $(\widehat{\tau}_p, \widehat{A})$  are equivalent. The proof is completed.  $\square$

### 6.5 Proof of Theorem 2.5

**Theorem 2.5.** Given a set  $\mathcal{D} = \{D_i\}_{i=1}^m$  of  $q$ -by- $q$  matrices with  $\underline{D}$  having full column rank.

(I) If  $\mathcal{D}$  does not have a nontrivial diagonalizer, then the feasible set of  $\text{OPT}(\mathcal{D})$  is empty.

(II) If  $\mathcal{D}$  has a nontrivial diagonalizer, then  $\text{OPT}(\mathcal{D})$  has a solution  $X_*$ . In addition, assume

$$\mu = \min_{\|z\|=1} \sqrt{\sum_{i=1}^m |z^H D_i z|^2} > 0,$$

then  $X_*$  has two distinct real eigenvalues, and the gap between them are no less than two.

*Proof.* First, we show of (I) via its the contrapositive. If the feasible set of  $\text{OPT}(\mathcal{D})$  is not empty, then it has a solution  $X_*$ . Using  $\text{tr}(X_*) = 0$ ,  $\text{tr}(X_*^2) = q > 0$ , we know that  $X_*$  can be factorized into  $X_* = Y \text{diag}(\Gamma_1, \Gamma_2) Y^{-1}$ , where  $\Gamma_1, \Gamma_2$  are real matrices and  $\lambda(\Gamma_1), \lambda(\Gamma_2)$  lie in the open left and closed right complex planes, respectively. Therefore,  $\lambda(\Gamma_1) \cap \lambda(\Gamma_2) = \emptyset$ . By Theorem 2.3,  $\mathcal{D}$  has a nontrivial diagonalizer, completing the proof of (I).

Next, we show (II). Let  $\gamma$  be an arbitrary eigenvalue of  $X_*$ , and  $z$  be the corresponding eigenvector. Using  $X_* \in \mathcal{N}(\mathcal{D})$ , we have

$$0 = z^H D_i X_* z - z^H X_*^T D_i z = (\gamma - \bar{\gamma}) z^H D_i z, \quad \text{for } 1 \leq i \leq m.$$

Then it follows that

$$(\gamma - \bar{\gamma}) \sum_{i=1}^m |z^H D_i z|^2 = 0.$$

Since  $\mu > 0$  has full column rank, we know that  $\sum_{i=1}^m |z^H D_i z|^2 = 0$ . Therefore,  $\gamma$  is real. And it follows  $\lambda(X_*) \subset \mathbb{R}$ .

Now we show that  $X_*$  has two distinct eigenvalues. Denote the eigenvalues of  $X_*$  by  $\gamma_1 \leq \dots \leq \gamma_q$ . Then

$$\text{tr}(X_*) = \sum_{j=1}^q \gamma_j = 0, \quad \text{tr}(X_*^2) = \sum_{j=1}^q \gamma_j^2 = q, \quad \text{tr}(X_*^4) = \sum_{j=1}^q \gamma_j^4. \quad (29)$$

Using the method of Lagrange multipliers, we consider

$$L(\gamma_1, \dots, \gamma_q; \mu_1, \mu_2) = \sum_{j=1}^q \gamma_j^4 + \mu_1 \sum_{j=1}^q \gamma_j + \mu_2 \left( \sum_{j=1}^q \gamma_j^2 - q \right),$$

where  $\mu_1, \mu_2$  are Lagrange multipliers. By calculations, we have

$$\frac{\partial L}{\partial \gamma_j} = 4\gamma_j^3 + \mu_1 + 2\mu_2 \gamma_j = 0. \quad (30)$$

Noticing that  $\gamma_j$ 's are the real roots of the third order equation  $4t^3 + 2\mu_2 t + \mu_1 = 0$ , which has one real root or three real roots, we know that either  $\gamma_j$ 's are identical to the unique real root or  $\gamma_j$  is one of the three real roots for all  $j$ . The former case is impossible since  $\sum_j \gamma_j = 0$  and  $\sum_j \gamma_j^2 = q$ . For the latter case, set  $\gamma_1 = \dots = \gamma_{q_1} = t_1$ ,  $\gamma_{q_1+1} = \dots = \gamma_{q_1+q_2} = t_2$  and  $\gamma_{q_1+q_2+1} = \dots = \gamma_q = t_3$ , where  $t_1 \leq t_2 \leq t_3$  are the three real roots,  $q_1, q_2$  and  $q_3$  are respectively the multiplicities of  $t_1, t_2$  and  $t_3$  as eigenvalues of  $X_*$ . If  $t_1 = t_2$  or  $t_2 = t_3$ ,  $X_*$  has two distinct eigenvalues. In what follows we assume  $t_1 < t_2 < t_3$ .

Using (29), we get

$$q_1 t_1 + q_2 t_2 + q_3 t_3 = 0, \quad q_1 t_1^2 + q_2 t_2^2 + q_3 t_3^2 = q, \quad \text{tr}(X_*^4) = q_1 t_1^4 + q_2 t_2^4 + q_3 t_3^4. \quad (31)$$

Introduce two vectors  $u = [\sqrt{q_1} t_1^2, \sqrt{q_2} t_2^2, \sqrt{q_3} t_3^2]^\top$ ,  $v = [\sqrt{q_1}, \sqrt{q_2}, \sqrt{q_3}]^\top$ . Then we have  $\|u\| = \sqrt{\text{tr}(X_*^4)}$ ,  $\|v\| = \sqrt{q}$ . Using Cauchy's inequality, we get

$$\text{tr}(X_*^4) = \|u\|^2 \|v\|^2 / q \geq (u^\top v)^2 / q = (q_1 t_1^2 + q_2 t_2^2 + q_3 t_3^2)^2 / q = q,$$

and the equality holds if and only if  $u$  and  $v$  are co-linear. Using the first two equalities of (31),  $q_1, q_2, q_3$  can not have more than one zeros. If one of  $q_1, q_2, q_3$  is zero,  $X_*$  has two distinct eigenvalues. Otherwise,  $q_1, q_2$  and  $q_3$  are all positive integers. Therefore,  $t_1^2 = t_2^2 = t_3^2$ , which implies that  $X_*$  has two distinct eigenvalues.

The above proof essentially show that the optimal value is achieved at  $X = X_*$ . The following statements show that such an  $X$  is feasible in  $\mathcal{N}(\mathcal{D})$ . If  $\mathcal{D}$  has a nontrivial diagonalizer, then there exists a matrix  $Z$  such that  $D_i = Z\Phi_i Z^\top$ , where  $\Phi_i$ 's are  $\tau_q = (q_1, q_2)$ -block diagonal. Since  $\underline{D}$  has full column rank,  $Z$  is nonsingular. Let  $X = Z^{-T} \text{diag}(\sqrt{\frac{q_2}{q_1}} I_{q_1}, -\sqrt{\frac{q_1}{q_2}} I_{q_2}) Z^\top$ . It is easy to see that  $\text{tr}(X) = 0$ ,  $\text{tr}(X^2) = 1$  and  $X \in \mathcal{N}(\mathcal{D})$ . In other words, there exists a feasible  $X$  which has two distinct real eigenvalues. Therefore, we may declare that  $\text{OPT}(\mathcal{D})$  is minimized at  $X = X_*$ , with  $X_*$  having two distinct real eigenvalues.

Lastly, let  $\gamma_1 > \gamma_2$  be the distinct real eigenvalues of  $X_*$ , with multiplicities  $q_1$  and  $q_2$ , respectively, we show  $\gamma_1 - \gamma_2 \geq 2$ . Rewrite the first equalities of (29) as

$$q_1 \gamma_1 + q_2 \gamma_2 = 0, \quad q_1 \gamma_1^2 + q_2 \gamma_2^2 = q.$$

By calculations, we get  $\gamma_1 = \sqrt{\frac{q_2}{q_1}}$ ,  $\gamma_2 = -\sqrt{\frac{q_1}{q_2}}$ . Then it follows that

$$\gamma_1 - \gamma_2 = \sqrt{\frac{q_2}{q_1}} + \sqrt{\frac{q_1}{q_2}} \geq 2,$$

completing the proof.  $\square$

## 6.6 Proof of Theorem 2.6

**Theorem 2.6.** Assume that the BJBDP for  $\mathcal{C}$  is uniquely  $\tau_p$ -block-diagonalizable, and let  $(\tau_p, A)$  be a solution satisfying (1). Then  $(\tau_p, A)$  can be identified via Algorithm 2, almost surely.

*Proof.* If we can show  $\text{card}(\hat{\tau}_p) = \text{card}(\tau_p)$ , then  $(\hat{\tau}_p, \hat{A})$  is also a solution to the BJBDP for  $\mathcal{C}$ . Since the BJBDP is uniquely  $\tau_p$ -block-diagonalizable, we know that  $(\hat{\tau}_p, \hat{A})$  is equivalent to  $(\tau_p, A)$ , i.e.,  $(\tau_p, A)$  is identified. Next, we show  $\text{card}(\hat{\tau}_p) = \text{card}(\tau_p)$ . The following facts are needed.

- (1) Given a matrix set  $\mathcal{D}$  with  $\underline{D}$  having full column rank. If  $\mathcal{D}$  does not have any  $\tau_q$ -block diagonalizer with  $\text{card}(\tau_q) \geq 2$ , then  $\hat{\tau}$  on Line 9 of Algorithm 2 satisfies  $\text{card}(\hat{\tau}) = 1$ ; Otherwise,  $\text{card}(\hat{\tau}) = 2$ .
- (2) Denote  $\hat{Z}^{-1} D_i \hat{Z}^{-\top} = \text{diag}(D_i^{(1)}, D_i^{(2)})$ ,  $\mathcal{D}^{(1)} = \{D_i^{(1)}\}$  and  $\mathcal{D}^{(2)} = \{D_i^{(2)}\}$ . Then  $\underline{D}^{(1)}$  and  $\underline{D}^{(2)}$  both have full column rank.

Fact (1) is because when  $\text{card}(\hat{\tau}) > 1$ ,  $\mathcal{D}$  can be block diagonalized. Fact (2) is due to the fact  $\hat{Z}$  is nonsingular and  $\hat{Z}^{-1} D_i \hat{Z}^{-\top} = \text{diag}(D_i^{(1)}, D_i^{(2)})$ .

Now assume that the solution  $(\hat{\tau}_p, \hat{A})$  returned by Algorithm 2 satisfies

$$\hat{\tau}_p = (\hat{p}_1, \dots, \hat{p}_{\hat{\ell}}), \quad C_i = \hat{A} \hat{\Sigma}_i \hat{A}^\top = \hat{A} \text{diag}(\hat{\Sigma}_i^{(11)}, \dots, \hat{\Sigma}_i^{(\hat{\ell}\hat{\ell})}) \hat{A}^\top, \quad i = 1, \dots, m, \quad (32)$$

where  $\hat{\Sigma}_i$ 's are all  $\hat{\tau}_p$ -block diagonal. Then  $\hat{\ell} \leq \ell$  and  $\{\hat{\Sigma}_i^{(jj)}\}_{i=1}^m$  can be further block diagonalized for all  $j = 1, \dots, \hat{\ell}$ . Next, we show  $\text{card}(\hat{\tau}_p) = \hat{\ell} = \ell = \text{card}(\tau_p)$  by contradiction.

Using (1) and (32), we have

$$B_i = V_1^\top \hat{A} \hat{\Sigma}_i \hat{A}^\top V_1 = \hat{Z} \hat{\Sigma}_i \hat{Z}^\top = V_1^\top A \Sigma_i A^\top V_1 = Z \Sigma_i Z^\top. \quad (33)$$

where  $\hat{Z} = V_1^\top \hat{A}$ ,  $Z = V_1^\top A$ . By Theorem 2.1, we know that  $\mathcal{R}(V_1) = \mathcal{R}(\underline{C}^\top) = \mathcal{R}(A)$ . By the construction of  $\hat{A}$ , we know  $\mathcal{R}(V_1) = \mathcal{R}(\hat{A})$ . Since  $V_1, A, \hat{A}$  all have full column rank, we know that  $\hat{Z}$  and  $Z$  are both nonsingular. Then it follows from (33) that

$$\hat{\Sigma}_i = Y^\top \Sigma_i Y, \quad \text{for } 1 \leq i \leq m. \quad (34)$$

where  $Y = Z^\top \widehat{Z}^{-\top}$ . Let  $\Gamma = Y \text{diag}(\gamma_1 I_{\hat{p}_1}, \dots, \gamma_\ell I_{\hat{p}_\ell}) Y^{-1}$ , where  $\gamma_1, \dots, \gamma_\ell$  are distinct real numbers. Using (34), we have

$$\Sigma_i \Gamma = Y^{-\top} (Y^\top \Sigma_i Y) \text{diag}(\gamma_j I_{\hat{p}_j}) Y^{-1} = Y^{-\top} \text{diag}(\gamma_j I_{\hat{p}_j}) (Y^\top \Sigma_i Y) Y^{-1} = \Gamma^\top \Sigma_i, \quad (35)$$

i.e.,  $\Gamma \in \mathcal{N}(\{\Sigma_i\})$ .

Partition  $\Gamma = [\Gamma_{jk}]$  with  $\Gamma_{jk} \in \mathbb{R}^{p_j \times p_k}$ . Recall (4) and (5), by (P2), we have  $\Gamma_{jk} = 0$  for  $j \neq k$ , i.e.,  $\Gamma$  is  $\tau_p$ -block diagonal; using (P1),  $\Gamma = Y \text{diag}(\gamma_j I_{\hat{p}_j}) Y^{-1}$  and  $\cup_{j=1}^\ell \lambda(\Gamma_{jj}) = \lambda(\Gamma)$ , we know that for each  $\Gamma_{jj}$  ( $j = 1, \dots, \ell$ ), its eigenvalues are all  $\gamma_k$  ( $1 \leq k \leq \hat{\ell}$ ). If  $\hat{\ell} < \ell$ , there exist at least two blocks of  $\Gamma_{jj}$ 's corresponding to the same  $\gamma_k$ . Without loss of generality, let  $\Gamma_{11}, \Gamma_{22}$  correspond to  $\gamma_1$ , the remaining blocks correspond to other  $\gamma_k$ 's. Then using  $\Gamma = Y \text{diag}(\gamma_1 I_{\hat{p}_1}, \dots, \gamma_\ell I_{\hat{p}_\ell}) Y^{-1}$ , we know that  $Y = \text{diag}(Y_{11}, Y_{22})$ , where  $Y_{11} \in \mathbb{R}^{\hat{p}_1 \times \hat{p}_1}$  and  $\hat{p}_1 = p_1 + p_2$ . Using  $Y = Z^\top \widehat{Z}^{-\top}$  and (35), we get

$$\widehat{\Sigma}_i = Y^\top \Sigma_i Y = \text{diag}(Y_{11}, Y_{22})^\top \Sigma_i \text{diag}(Y_{11}, Y_{22}), \quad \text{for } 1 \leq i \leq m.$$

Therefore, we have

$$\widehat{\Sigma}_i^{(11)} = Y_{11}^\top \text{diag}(\Sigma_i^{(11)}, \Sigma_i^{(22)}) Y_{11}, \quad \text{for } 1 \leq i \leq m,$$

which contradicts with the fact that  $\{\widehat{\Sigma}_i^{(11)}\}_{i=1}^m$  can not be further block diagonalized. The proof is completed.  $\square$

## 6.7 Proof of Theorem 2.7

**Theorem 2.7.** Given a set  $\widetilde{\mathcal{D}} = \{\widetilde{D}_i\}_{i=1}^m$  of  $q$ -by- $q$  matrices with  $\widetilde{D}$  having full column rank. Let  $\delta = o(1)$  be a small real number.

(I) If  $\widetilde{\mathcal{D}}$  does not have a nontrivial  $\delta$ -diagonalizer, then the feasible set of  $\text{OPT}(\widetilde{\mathcal{D}}, \delta)$  is empty.

(II) If  $\widetilde{\mathcal{D}}$  has a nontrivial  $\delta$ -diagonalizer, then  $\text{OPT}(\widetilde{\mathcal{D}}, \delta)$  has a solution  $X_*$ . In addition, assume

$$\mu = \min_{\|z\|=1} \sqrt{\sum_{i=1}^m |z^H \widetilde{D}_i z|^2} = O(1),$$

and for  $i = 1, 2$ , let

$$\text{Rect}_i \triangleq \{z \in \mathbb{C} \mid |\text{Re}(z) - \rho_i| \leq a, |\text{Im}(z)| \leq b\},$$

where  $a = O(\delta)$ ,  $b = O(\delta)$ . Then

$$\lambda(X_*) \subset \cup_{i=1}^2 \text{Rect}_i, \quad \rho_1 - \rho_2 \geq 2 + O(\delta).$$

*Proof.* First, we show of (I) via its the contrapositive. If the feasible set of  $\text{OPT}(\widetilde{\mathcal{D}}, \delta)$  is not empty, then  $\text{OPT}(\widetilde{\mathcal{D}}, \delta)$  has a solution  $X_*$ , which can be factorized into  $X_* = Y \text{diag}(\Gamma_1, \Gamma_2) Y^{-1}$  (since  $\text{tr}(X_*) = 0$  and  $\text{tr}(X_*^2) = q$ ), where  $Y$  is nonsingular,  $\Gamma_1 \in \mathbb{R}^{q_1 \times q_1}$ ,  $\Gamma_2 \in \mathbb{R}^{q_2 \times q_2}$  and  $\lambda(\Gamma_1) \cap \lambda(\Gamma_2) = \emptyset$ . Set  $Z = Y^{-\top}$ ,  $\Phi_i = \text{diag}(Y_1^\top \widetilde{D}_i Y_1, Y_2^\top \widetilde{D}_i Y_2)$ ,  $g = \min \frac{\|\Gamma_1^\top X - X \Gamma_2\|_F}{\|X\|_F}$  and  $\kappa = \kappa_2(Y) = \frac{\sigma_{\max}(Y)}{\sigma_{\min}(Y)}$ . By calculations, we have

$$\begin{aligned} \|X_*\|_F^2 &= \text{tr}(Y^{-\top} \text{diag}(\Gamma_1^\top, \Gamma_2^\top) Y^\top Y \text{diag}(\Gamma_1, \Gamma_2) Y^{-1}) \\ &\leq \|Y\|^2 \text{tr}(Y^{-\top} \text{diag}(\Gamma_1^\top, \Gamma_2^\top) \text{diag}(\Gamma_1, \Gamma_2) Y^{-1}) \\ &= \|Y\|^2 \text{tr}(\text{diag}(\Gamma_1, \Gamma_2) Y^{-1} Y^{-\top} \text{diag}(\Gamma_1^\top, \Gamma_2^\top)) \\ &\leq \kappa^2 \text{tr}(\text{diag}(\Gamma_1, \Gamma_2) \text{diag}(\Gamma_1^\top, \Gamma_2^\top)) = \kappa^2 \text{tr}(X_*^2) = \kappa^2 q, \end{aligned} \quad (36)$$

and

$$\begin{aligned}
 \delta^2 \|\text{vec}(X_*)\|^2 &\stackrel{(a)}{\geq} \|\mathbf{L}(\widetilde{\mathcal{D}})\text{vec}(X_*)\|^2 = \sum_{i=1}^m \|\widetilde{D}_i X_* - X_*^\top \widetilde{D}_i\|_F^2 \\
 &= \sum_{i=1}^m \|Z(Y^\top \widetilde{D}_i Y \text{diag}(\Gamma_1, \Gamma_2) - \text{diag}(\Gamma_1^\top, \Gamma_2^\top) Y^\top \widetilde{D}_i Y) Z^\top\|_F^2 \\
 &\geq \frac{1}{\|Y\|^4} \sum_{i=1}^m \|Y^\top \widetilde{D}_i Y \text{diag}(\Gamma_1, \Gamma_2) - \text{diag}(\Gamma_1^\top, \Gamma_2^\top) Y^\top \widetilde{D}_i Y\|_F^2 \\
 &\geq \frac{1}{\|Y\|^4} \sum_{i=1}^m \left( \|Y_1^\top \widetilde{D}_i Y_2 \Gamma_2 - \Gamma_1^\top Y_1^\top \widetilde{D}_i Y_2\|_F^2 + \|Y_2^\top \widetilde{D}_i Y_1 \Gamma_1 - \Gamma_2^\top Y_2^\top \widetilde{D}_i Y_1\|_F^2 \right) \\
 &\stackrel{(b)}{\geq} \frac{g^2}{\|Y\|^4} \sum_{i=1}^m \left( \|Y_1^\top \widetilde{D}_i Y_2\|_F^2 + \|Y_2^\top \widetilde{D}_i Y_1\|_F^2 \right) \geq \frac{g^2}{\kappa^4} \sum_{i=1}^m \|Z(Y^\top \widetilde{D}_i Y - \Phi_i) Z^\top\|_F^2 \\
 &= \frac{g^2}{\kappa^4} \sum_{i=1}^m \|\widetilde{D}_i - Z \Phi_i Z^\top\|_F^2, \tag{37}
 \end{aligned}$$

where (a) uses  $X_* \in \mathcal{N}_\delta(\widetilde{\mathcal{D}})$ , (b) uses the definition of  $g$ . Then it follows from (36) and (37) that

$$\sum_{i=1}^m \|\widetilde{D}_i - Z \Phi_i Z^\top\|_F^2 \leq \frac{\kappa^4 \|X_*\|_F^2}{g^2} \delta^2 \leq \frac{\kappa^6}{g^2 q} \delta^2.$$

This completes the proof of (I).

Next, we show (II). If  $\widetilde{\mathcal{D}}$  has a nontrivial  $\delta$ -diagonalizer, then there exists a matrix  $Z$  such that  $\sum_{i=1}^m \|\widetilde{D}_i - Z \Phi_i Z^\top\|_F^2 \leq \frac{1}{4} \delta^2$  (by setting  $\delta = \frac{1}{2\sqrt{C}} \delta$ , the constant becomes  $\frac{1}{4}$ , and by definition,  $Z$  is still a  $\delta$ -diagonalizer), where  $\Phi_i$ 's are all  $\tau_q = (q_1, q_2)$  block diagonal matrices. Let  $X = Z^{-\top} \Gamma Z^\top$ , where  $\Gamma = \text{diag}(\sqrt{\frac{q_2}{q_1}} I_{q_1}, -\sqrt{\frac{q_1}{q_2}} I_{q_2})$ . By calculations, we have

$$\begin{aligned}
 \|\mathbf{L}(\widetilde{\mathcal{D}})\text{vec}(X)\|^2 &= \sum_{i=1}^m \|\widetilde{D}_i X - X^\top \widetilde{D}_i\|_F^2 \stackrel{(a)}{\leq} 2 \sum_{i=1}^m \|(\widetilde{D}_i - Z \Phi_i Z^\top) X - X^\top (\widetilde{D}_i - Z \Phi_i Z^\top)\|_F^2 \\
 &\leq 4 \|X\|^2 \sum_{i=1}^m \|\widetilde{D}_i - Z \Phi_i Z^\top\|_F^2 \leq \|X\|^2 \delta^2,
 \end{aligned}$$

where (a) uses  $Z \Phi_i Z^\top X - X^\top Z \Phi_i Z^\top = 0$ . Therefore,  $\frac{\|\mathbf{L}(\widetilde{\mathcal{D}})\text{vec}(X)\|}{\|\text{vec}(X)\|} \leq \frac{\|X\| \delta}{\|X\|_F} \leq \delta$ . Also note that  $\text{tr}(X) = 0$  and  $\text{tr}(X^2) = q$ , then the feasible set of  $\text{OPT}(\widetilde{\mathcal{D}}, \delta)$  is nonempty. Consequently,  $\text{OPT}(\widetilde{\mathcal{D}}, \delta)$  has a solution  $X_*$ .

Let  $\gamma$  be an arbitrary eigenvalue of  $X_*$ , and  $z$  be the corresponding unit-length eigenvector. By calculations, we have

$$\begin{aligned}
 \kappa^2 q \delta^2 &\geq \delta^2 \|X_*\|_F^2 = \|\mathbf{L}(\widetilde{\mathcal{D}})\text{vec}(X)\|^2 \geq \sum_{i=1}^m \|\widetilde{D}_i X_* - X_*^\top \widetilde{D}_i\|_F^2 \\
 &\geq \sum_{i=1}^m \|z^H \widetilde{D}_i X_* z - z^H X_*^\top \widetilde{D}_i z\|_F^2 = |\gamma - \bar{\gamma}|^2 \sum_{i=1}^m |z^H \widetilde{D}_i z|^2 \geq \mu^2 |\gamma - \bar{\gamma}|^2, \tag{38}
 \end{aligned}$$

Then we know that the imaginary part of  $\mu$  is no more than  $\frac{\sqrt{q} \kappa \delta}{2\mu} = O(\delta)$ .

Now let the eigenvalues of  $X_*$  be  $\mu_j + \eta_j \sqrt{-1}$  for  $j = 1, \dots, q$ , where  $\mu_j, \eta_j \in \mathbb{R}$ . Then

$$\text{tr}(X_*) = \sum_{j=1}^q \gamma_j = 0, \quad \text{tr}(X_*^2) = \sum_{j=1}^q (\gamma_j^2 - \eta_j^2) = q, \quad \text{tr}(X_*^4) = \sum_{j=1}^q (\gamma_j^4 + \eta_j^4 - 6\gamma_j^2 \eta_j^2). \tag{39}$$



Using the method of Lagrange multipliers, we consider

$$L(\gamma_1, \eta_1, \dots, \gamma_q, \eta_q; \mu_1, \mu_2) = \sum_{j=1}^q (\gamma_j^4 + \eta_j^4 - 6\gamma_j^2 \eta_j^2) + \mu_1 \sum_{j=1}^q \gamma_j + \mu_2 \left( \sum_{j=1}^q (\gamma_j^2 - \eta_j^2) - q \right),$$

where  $\mu_1, \mu_2$  are Lagrange multipliers. By calculations, we have

$$\frac{\partial L}{\partial \gamma_j} = 4\gamma_j^3 + 2(\mu_2 - 6\eta_j^2)\gamma_j + \mu_1 = 0. \quad (40)$$

Take (40) as perturbed third order equations of  $4t^3 + 2\mu_2 t + \mu_1 = 0$ . Using Lemma 5.3 and  $|\eta_j| \leq O(\delta)$ , we know that  $\gamma_j \subset \cup_{i=1}^3 \{z \mid |z - t_i| \leq O(\delta)\}$ , where  $t_1, t_2$  and  $t_3$  are the roots of  $4t^3 + 2\mu_2 t + \mu_1 = 0$ . Next, we consider the following cases:

**Case (1)**  $t_1 = \bar{t}_2 \notin \mathbb{R}, t_3 \in \mathbb{R}$ .

In this case, set  $\rho_1 = \text{Re}(t_1), \rho_2 = t_3$ , then  $\lambda(X_*) \subset \cup_{i=1,2} \text{Rect}_i$ .

**Case (2)**  $t_1, t_2, t_3 \in \mathbb{R}, t_i = \xi + O(\delta)$  for  $i = 1, 2, 3$ .

In this case, using  $t_1 + t_2 + t_3 = 0$  (by Vieta's formulas), we get  $\xi = O(\delta)$ . Then it follows that  $|\gamma_j| = O(\delta)$  for all  $j$ . Using (39) and  $\eta_j = O(\delta)$ , we get  $q \times O(\delta^2) = q$ , which contradicts with  $\delta = o(1)$ .

**Case (3)**  $t_1, t_2, t_3 \in \mathbb{R}, t_i = \xi + O(\delta)$  for  $i = 1, 2$ .

In this case, set  $\rho_1 = \xi, \rho_2 = t_3$ , then  $\lambda(X_*) \subset \cup_{i=1,2} \text{Rect}_i$ .

**Case (4)**  $t_1, t_2, t_3 \in \mathbb{R}, |t_i - t_j| > O(\delta)$  for  $i \neq j$ .

In this case, without loss of generality, assume  $t_1 < t_2 < t_3$ , and there are  $p_i$  eigenvalues of  $X_*$  lie in  $\{z \mid |z - t_i| \leq O(\delta)\}$ , for  $i = 1, 2, 3$ . Using  $\eta_j = O(\delta)$  and (39), we get

$$\text{tr}(X_*) = q_1 t_1 + q_2 t_2 + q_3 t_3 + O(\delta) = 0, \quad (41a)$$

$$\text{tr}(X_*^2) = q_1 t_1^2 + q_2 t_2^2 + q_3 t_3^2 + O(\delta) = q, \quad (41b)$$

$$\text{tr}(X_*^4) = q_1 t_1^4 + q_2 t_2^4 + q_3 t_3^4 + O(\delta). \quad (41c)$$

Let  $u = [\sqrt{q_1} t_1^2, \sqrt{q_2} t_2^2, \sqrt{q_3} t_3^2]^\top, v = [\sqrt{q_1}, \sqrt{q_2}, \sqrt{q_3}]^\top$ . Then we have  $\|u\|^2 + O(\delta) = \text{tr}(X_*^4), \|v\| = \sqrt{q}$ . Using Cauchy's inequality, we get

$$\text{tr}(X_*^4) + O(\delta) = \|u\|^2 = \|u\|^2 \|v\|^2 / q \geq (u^\top v)^2 / q = (q_1 t_1^2 + q_2 t_2^2 + q_3 t_3^2)^2 / q = q + O(\delta),$$

and the equality holds if and only if  $u$  and  $v$  are co-linear. Using the first two equalities of (41),  $q_1, q_2, q_3$  can not have more than one zeros. If one of  $q_1, q_2, q_3$  is zero, say  $q_3 = 0$ , then the eigenvalues of  $X_*$  lie in two disks  $\cup_{i=1,2,3, q_i \neq 0} \{z \mid |z - t_i| \leq O(\delta)\}$ . Otherwise,  $q_1, q_2$  and  $q_3$  are all positive integers. Therefore,  $t_1^2 = t_2^2 = t_3^2$ , which implies that  $t_2 = t_1$  or  $t_2 = t_3$ . This contradicts with  $t_1 < t_2 < t_3$ . To summarize, the eigenvalues of  $X_*$  lie in  $\cup_{i=1,2} \text{Rect}_i$ .

The above proof essentially show that the optimal value is achieved at  $X \equiv X_*$ , with its eigenvalues lie in  $\cup_{i=1,2} \text{Rect}_i$ . The following statements show that such an  $X$  is feasible in  $\mathcal{N}_\delta(\widetilde{\mathcal{D}})$ .

If  $\widetilde{\mathcal{D}}$  has a nontrivial  $\delta$ -diagonalizer, then there exists a matrix  $Z$  such that  $\sum_{i=1}^m \|\widetilde{D}_i - Z \Phi_i Z^\top\|_F^2 \leq \frac{1}{4} \delta^2$ , where  $\Phi_i$ 's are all  $\tau_q = (q_1, q_2)$  block diagonal matrices. Let  $X = Z^{-\top} \Gamma Z^\top$ , where  $\Gamma = \text{diag}(\sqrt{\frac{q_2}{q_1}} I_{q_1}, -\sqrt{\frac{q_1}{q_2}} I_{q_2})$ . We know that  $X$  is also feasible. Therefore, we may declare that  $\text{OPT}(\widetilde{\mathcal{D}}, \delta)$  is minimized at  $X = X_*$ , with the eigenvalues of  $X_*$  lying in two disks.

Lastly, let  $(\rho_1, 0), (\rho_2, 0)$  be the centers of the two disks, and there are  $q_1, q_2$  eigenvalues of  $X_*$  lie  $\text{Disk}_1, \text{Disk}_2$ , respectively. We show  $\rho_1 - \rho_2 \geq 2 + O(\delta)$ . Rewrite the first two equalities of (41) as

$$q_1 \rho_1 + q_2 \rho_2 = O(\delta), \quad q_1 \rho_1^2 + q_2 \rho_2^2 = q + O(\delta).$$

By calculations, we get  $\rho_1 = \sqrt{\frac{q_2}{q_1}} + O(\delta), \rho_2 = -\sqrt{\frac{q_1}{q_2}} + O(\delta)$ . Then it follows that

$$\rho_1 - \rho_2 = \sqrt{\frac{q_2}{q_1}} + \sqrt{\frac{q_1}{q_2}} + O(\delta) \geq 2 + O(\delta),$$

completing the proof.  $\square$

## 6.8 Proof of Theorem 2.8

**Theorem 2.8.** Assume that the BJB DP for  $\mathcal{C} = \{C_i\}_{i=1}^m$  is uniquely  $\tau_p$ -block-diagonalizable, and let  $(\tau_p, A)$  be a solution satisfying (1). Let  $\tilde{\mathcal{C}} = \{\tilde{C}_i\}_{i=1}^m = \{C_i + E_i\}_{i=1}^m$  be a perturbed matrix set of  $\mathcal{C}$ . Denote

$$\tau_p = (p_1, \dots, p_\ell), \quad \hat{\tau}_p = (\hat{p}_1, \dots, \hat{p}_\ell), \quad A = [A_1, \dots, A_\ell], \quad \hat{A} = [\hat{A}_1, \dots, \hat{A}_\ell],$$

where  $(\hat{\tau}_p, \hat{A})$  is the output of Algorithm 4. Assume  $\mathcal{N}(G_{jj}) = \mathcal{R}(\text{vec}(I_{p_j}))$  for all  $j$ , where  $G_{jj}$  is defined in (5a). Also assume that  $p$  is correctly identified in Line 3 of Algorithm 4. Let the singular values of  $\tilde{\mathcal{C}}$  be the same as in Theorem 2.2,

$$\epsilon = \frac{\|\underline{E}\|}{\tilde{\phi}_p}, \quad r = \frac{\sqrt{2(d+2C)} \tilde{\phi}_p \epsilon}{\sigma_{\min}^2(A)(1-\epsilon^2)}, \quad g_j = \frac{\sqrt{2j}}{(\hat{\ell}-1)\kappa\sqrt{p}} - \max\left\{\frac{\kappa}{\omega_{\text{neq}}}, \frac{1}{\omega_{\text{ir}}}\right\}r, \quad \text{for } j = 1, 2,$$

where  $C$  and  $\kappa$  are two constants.

(I) If  $g_1 > 0$ , then  $\hat{\ell} = \ell$ , and there exists a permutation  $\{1', 2', \dots, \ell'\}$  of  $\{1, 2, \dots, \ell\}$  such that  $p_j = \hat{p}_{j'}$ . In other words,  $\hat{\tau}_p \sim \tau_p$ .

(II) Further assume  $g_2 > \frac{r}{\omega_{\text{ir}}}$ , then there exists a  $\tau_p$ -block diagonal matrix  $D$  such that

$$\|[\hat{A}_{1'}, \dots, \hat{A}_{\ell'}] - AD\|_F \leq \frac{\frac{c}{\omega_{\text{neq}}} r}{g_2 - \frac{r}{\omega_{\text{ir}}}} \|A\|_F + \left(\frac{\epsilon^2}{\sqrt{1-\epsilon^2}} + \epsilon\right) \|\hat{A}\|_F = O(\epsilon),$$

where  $c$  is a constant.

*Proof.* Using  $\|\underline{E}\| < \epsilon \tilde{\phi}_p$  and Theorem 2.2, we have

$$\delta = \tilde{\phi}_{p+1} \leq \|\underline{E}\| \leq \epsilon \tilde{\phi}_p, \quad \|\sin \Theta(\mathcal{R}(A), \mathcal{R}(\tilde{V}_1))\| \leq \frac{\|\tilde{U}_1^\top \underline{E} V_2\|}{\tilde{\phi}_p} \leq \frac{\|\underline{E}\|}{\tilde{\phi}_p} \leq \epsilon. \quad (42)$$

Let  $[V_1, V_2]$  be an orthogonal matrix such that  $\mathcal{R}(V_1) = \mathcal{R}(A)$ ,  $\mathcal{R}(V_2) = \mathcal{N}(A^\top)$ . Then we can write  $\tilde{V}_1 = V_1 T_c + V_2 T_s$ , where  $\begin{bmatrix} T_c \\ T_s \end{bmatrix}$  is orthonormal,  $\|T_s\| = \|\sin \Theta(V_1, \tilde{V}_1)\| \leq \epsilon$ ,  $\sigma_{\min}(T_c) = \sqrt{1 - \|\sin \Theta(V_1, \tilde{V}_1)\|^2} \geq \sqrt{1 - \epsilon^2}$ .

Therefore,  $T_c$  is nonsingular. Let  $B_i = V_1^\top C_i V_1$ ,  $\tilde{B}_i = \tilde{V}_1^\top \tilde{C}_i \tilde{V}_1$ . And by calculations, we have

$$\begin{aligned} \|\tilde{B}_i - T_c^\top B_i T_c\|_F &= \|\tilde{V}_1^\top (C_i + E_i) \tilde{V}_1 - T_c^\top V_1^\top C_i V_1 T_c\|_F \\ &\leq \|\tilde{V}_1^\top C_i \tilde{V}_1 - T_c^\top V_1^\top C_i V_1 T_c + \tilde{V}_1^\top E_i \tilde{V}_1\|_F \\ &\stackrel{(a)}{\leq} \|T_c^\top V_1^\top C_i V_2 T_s + T_s^\top V_2^\top C_i V_1 T_c + T_s^\top V_2^\top C_i V_2 T_s + \tilde{V}_1^\top E_i \tilde{V}_1\|_F \\ &\stackrel{(b)}{=} \|E_i\|_F, \end{aligned} \quad (43)$$

where (a) uses  $\tilde{V}_1 = V_1 T_c + V_2 T_s$ , (b) uses  $A^\top V_2 = 0$  (by Theorem 2.1).

On one hand, let  $Z = T_c^\top V_1^\top A$ , using (1), we have

$$T_c^\top B_i T_c = T_c^\top V_1^\top A \Sigma_i A^\top V_1 T_c = Z \Sigma_i Z^\top. \quad (44)$$

On the other hand, on output of Algorithm 4, it holds that

$$\sum_{i=1}^m \|\tilde{B}_i - \hat{Z} \hat{\Sigma}_i \hat{Z}^\top\|_F^2 \leq C \delta^2 = C \tilde{\phi}_{p+1}^2 \leq C \tilde{\phi}_p^2 \epsilon^2, \quad (45)$$

where  $\hat{\Sigma}_i = \text{diag}(\Sigma_{i1}, \dots, \hat{\Sigma}_{i\hat{\ell}})$ 's are all  $\hat{\tau}_p = (\hat{p}_1, \dots, \hat{p}_{\hat{\ell}})$ -block diagonal, and for each  $1 \leq j \leq \hat{\ell}$ ,  $\{\Sigma_{ij}\}_{i=1}^m$  does not have  $\delta$ -block diagonalizer.

Using (43), (44) and (45), we have

$$\begin{aligned}
 \sum_{i=1}^m \|Z\Sigma_i Z^\top - \widehat{Z}\widehat{\Sigma}_i\widehat{Z}^\top\|_F^2 &\leq 2 \sum_{i=1}^m (\|Z\Sigma_i Z^\top - \widetilde{B}_i\|_F^2 + \|\widetilde{B}_i - \widehat{Z}\widehat{\Sigma}_i\widehat{Z}^\top\|_F^2) \\
 &\leq 2 \left( \sum_{i=1}^m \|E_i\|_F^2 + C\tilde{\phi}_p^2\epsilon^2 \right) = \|\underline{E}\|_F^2 + 2C\tilde{\phi}_p^2\epsilon^2 \leq d\|\underline{E}\|^2 + 2C\tilde{\phi}_p^2\epsilon^2 \\
 &\leq (d + 2C)\tilde{\phi}_p^2\epsilon^2.
 \end{aligned} \tag{46}$$

As  $T_c$  is nonsingular,  $A$  has full column rank,  $\mathcal{R}(V_1) = \mathcal{R}(A)$ , we know that  $Z$  is nonsingular.  $\widehat{Z}$  is also nonsingular since it is the product of a sequence of nonsingular matrices. Then we may let  $Y = Z^\top \widehat{Z}^{-\top}$ ,  $\Gamma = Y\widehat{\Gamma}Y^{-1} = \frac{1}{\varrho} Y \text{diag}(\gamma_1 I_{\hat{p}_1}, \dots, \gamma_\ell I_{\hat{p}_\ell}) Y^{-1}$ , where  $\gamma_j = -1 + \frac{2(j-1)}{\ell-1}$  for  $j = 1, \dots, \hat{\ell}$ ,  $\varrho = \|Y \text{diag}(\gamma_1 I_{\hat{p}_1}, \dots, \gamma_\ell I_{\hat{p}_\ell}) Y^{-1}\|_F$ . It follows

$$\varrho = \varrho \|\Gamma\|_F = \|Y \text{diag}(\gamma_1 I_{\hat{p}_1}, \dots, \gamma_\ell I_{\hat{p}_\ell}) Y^{-1}\|_F \leq \kappa(Y) \sqrt{\sum_{j=1}^{\hat{\ell}} \hat{p}_j \gamma_j^2} \leq \kappa(Y) \sqrt{p}. \tag{47}$$

Denote  $F_i = Z\Sigma_i Z^\top - \widehat{Z}\widehat{\Sigma}_i\widehat{Z}^\top$  for all  $i$ . Direct calculations give rise to

$$\begin{aligned}
 \sum_{i=1}^m \|\Sigma_i \Gamma - \Gamma^\top \Sigma_i\|_F^2 &= \sum_{i=1}^m \|Z^{-1} (Z\Sigma_i Z^\top \widehat{Z}^{-\top} \widehat{\Gamma} \widehat{Z}^\top - \widehat{Z} \widehat{\Gamma}^\top \widehat{Z}^{-1} Z\Sigma_i Z^\top) Z^{-\top}\|_F^2 \\
 &= \sum_{i=1}^m \|Z^{-1} ((\widehat{Z}\widehat{\Sigma}_i\widehat{Z}^\top + F_i) \widehat{Z}^{-\top} \widehat{\Gamma} \widehat{Z}^\top - \widehat{Z} \widehat{\Gamma}^\top \widehat{Z}^{-1} (\widehat{Z}\widehat{\Sigma}_i\widehat{Z}^\top + F_i)) Z^{-\top}\|_F^2 \\
 &= \sum_{i=1}^m \|Z^{-1} F_i Z^{-\top} \Gamma - \Gamma^\top Z^{-1} F_i Z^{-\top}\|_F^2 \\
 &\leq 2\|\Gamma\|_F^2 \sum_{i=1}^m \|Z^{-1} F_i Z^{-\top}\|^2 \stackrel{(a)}{\leq} \frac{2(d+2C)\tilde{\phi}_p^2\epsilon^2}{\sigma_{\min}^4(Z)} \stackrel{(b)}{\leq} r^2,
 \end{aligned} \tag{48}$$

where (a) uses (46),  $\|\Gamma\|_F = 1$  and (b) uses the definition of  $r$  and  $\sigma_{\min}(T_c) \geq \sqrt{1-\epsilon^2}$ .

Partition  $\Gamma = [\Gamma_{jk}]$  with  $\Gamma_{jk} \in \mathbb{R}^{p_j \times p_k}$ , and recall (4) and (5). Using (48), we get

$$\sum_{j=1}^{\hat{\ell}} \|G_{jj} \text{vec}(\Gamma_{jj})\|^2 + \sum_{1 < j < k \leq \hat{\ell}} \left\| G_{jk} \begin{bmatrix} \text{vec}(\Gamma_{jk}) \\ -\text{vec}(\Gamma_{kj}^\top) \end{bmatrix} \right\|^2 = \sum_{i=1}^m \|\Sigma_i \Gamma - \Gamma^\top \Sigma_i\|_F^2 \leq r^2. \tag{49}$$

Let  $r_{jj} = G_{jj} \text{vec}(\Gamma_{jj})$ , the eigenvalues of  $\Gamma_{jj}$  be  $\gamma_{j1}, \dots, \gamma_{jp_j}$ , for  $j = 1, \dots, \hat{\ell}$ . Then we have

$$\Gamma_{jj} = \widehat{\Gamma}_{jj} + \hat{\gamma}_j I_{p_j},$$

where  $\widehat{\Gamma}_{jj} = \text{reshape}(G_{jj}^\dagger r_{jj}, p_j, p_j)$ . And it follows that

$$\sum_{k=1}^{p_j} |\gamma_{jk} - \hat{\gamma}_j|^2 \leq \|\widehat{\Gamma}_{jj}\|_F^2 \leq \frac{\|r_{jj}\|^2}{\omega_{\text{ir}}^2}. \tag{50}$$

Let  $r_{jk} = G_{jk} \begin{bmatrix} \text{vec}(\Gamma_{jk}) \\ -\text{vec}(\Gamma_{kj}^\top) \end{bmatrix}$ , for  $1 \leq j < k \leq \hat{\ell}$ . Then we have

$$\|\Gamma_{jk}\|_F^2 + \|\Gamma_{kj}\|_F^2 \leq \|G_{jk}^\dagger r_{jk}\|^2 \leq \frac{\|r_{jk}\|^2}{\omega_{\text{neq}}^2}. \tag{51}$$

Let  $\mu_{jk} = \operatorname{argmin}_{\gamma \in \{\gamma_1, \dots, \gamma_\ell\}} \left| \frac{\mu_{jk}}{\varrho} - \gamma_{jk} \right|$ . By Sun (1996, Remark 3.3, (2)), it holds that

$$\sum_{j=1}^{\ell} \sum_{k=1}^{p_j} \left| \frac{\mu_{jk}}{\varrho} - \gamma_{jk} \right|^2 \leq \kappa^2(Y) \sum_{j < k} (\|\Gamma_{jk}\|_F^2 + \|\Gamma_{kj}\|_F^2) \quad (52)$$

Using (50), (51) and (52), we have

$$\begin{aligned} \sum_{j=1}^{\ell} \sum_{k=1}^{p_j} \left| \frac{\mu_{jk}}{\varrho} - \hat{\gamma}_j \right|^2 &\leq \sum_{j=1}^{\ell} \sum_{k=1}^{p_j} \left| \frac{\mu_{jk}}{\varrho} - \gamma_{jk} \right|^2 + \sum_{j=1}^{\ell} \sum_{k=1}^{p_j} |\gamma_{jk} - \hat{\gamma}_j|^2 \\ &\leq \frac{\kappa^2(Y)}{\omega_{\text{neq}}^2} \sum_{j < k} \|r_{jk}\|^2 + \frac{1}{\omega_{\text{ir}}^2} \sum_j \|r_{jj}\|^2 \leq \max\left\{ \frac{\kappa^2(Y)}{\omega_{\text{neq}}^2}, \frac{1}{\omega_{\text{ir}}^2} \right\} r^2. \end{aligned} \quad (53)$$

Now we declare that for any  $j$ , it holds that  $\mu_{j1} = \mu_{j2} = \dots = \mu_{jp_j}$ . Because otherwise, without loss of generality, say  $\mu_{j1} = \gamma_1$ ,  $\mu_{j2} = \gamma_2$ , and they corresponds to  $\hat{\gamma}_j$ , then we have

$$\sum_{j=1}^{\ell} \sum_{k=1}^{p_j} \left| \frac{\mu_{jk}}{\varrho} - \gamma_{jk} \right|^2 \geq \left| \frac{\gamma_1}{\varrho} - \hat{\gamma}_j \right|^2 + \left| \frac{\gamma_2}{\varrho} - \hat{\gamma}_j \right|^2 \geq \frac{|\gamma_1 - \gamma_2|^2}{2\varrho^2} \geq \frac{2}{(\hat{\ell} - 1)^2 \kappa^2(Y) p}, \quad (54)$$

where the last inequality uses the definition of  $\gamma_j$  and also (47). Combining (53) and (54), we get  $\max\left\{ \frac{\kappa(Y)}{\omega_{\text{neq}}}, \frac{1}{\omega_{\text{ir}}} \right\} r \geq \frac{1}{(\hat{\ell} - 1) \kappa(Y)} \sqrt{\frac{2}{p}}$ , which contradicts to the assumption that  $g_1 > 0$ . Therefore,  $\hat{\ell} = \ell$ , and there exists a permutation  $\{1', 2', \dots, \ell'\}$  of  $\{1, 2, \dots, \ell\}$  such that  $p_j = \hat{p}_{j'}$ , completing the proof of (I).

Without loss of generality, let  $j' = j$  for all  $j = 1, \dots, \ell$ . Let  $Y^{-\top} = [Y_{jk}]$ ,

$$R = [R_{jk}] = \text{OffBlkdiag}_{\tau_p}(\text{OffBlkdiag}_{\tau_p}(\Gamma^{\top})Y^{-\top}) + \text{diag}(\Gamma_{11} - \hat{\gamma}_1 I, \dots, \Gamma_{\ell\ell} - \hat{\gamma}_\ell I) \text{OffBlkdiag}_{\tau_p}(Y^{-\top}),$$

where  $Y_{jk}, R_{jk} \in \mathbb{R}^{p_j \times p_k}$ . Using  $\Gamma = Y \hat{\Gamma} Y^{-1} = \frac{1}{\varrho} Y \text{diag}(\gamma_1 I_{p_1}, \dots, \gamma_\ell I_{p_\ell}) Y^{-1}$ , we have  $\Gamma^{\top} Y^{-\top} = Y^{-\top} \hat{\Gamma}$ , whose off-block diagonal part reads

$$\text{diag}(\hat{\gamma}_1 I, \dots, \hat{\gamma}_\ell I) \text{OffBlkdiag}_{\tau_p}(Y^{-\top}) - \text{OffBlkdiag}_{\tau_p}(Y^{-\top}) \frac{1}{\varrho} \text{diag}(\gamma_1 I, \dots, \gamma_\ell I) = -R.$$

Then it follows that  $(\hat{\gamma}_j - \frac{\gamma_k}{\varrho}) Y_{jk} = R_{jk}$  for  $j \neq k$ . By calculations, we have

$$\begin{aligned} \|Y_{jk}\|_F &= \frac{\|R_{jk}\|_F}{|\hat{\gamma}_j - \gamma_k/\varrho|} \leq \frac{\|R_{jk}\|_F}{|\gamma_j/\varrho - \gamma_k/\varrho| - |\hat{\gamma}_j - \gamma_j/\varrho|} \stackrel{(a)}{\leq} \frac{\|R_{jk}\|_F}{\frac{2|j-k|}{\varrho(\ell-1)} - |\hat{\gamma}_j - \gamma_j/\varrho|} \stackrel{(b)}{\leq} \frac{\|R_{jk}\|_F}{g_2}, \\ \|R\|_F &\leq \|\text{OffBlkdiag}_{\tau_p}(\Gamma^{\top})\| \|Y^{-\top}\| + \max_j \|\Gamma_{jj} - \hat{\gamma}_j I\| \|\text{OffBlkdiag}_{\tau_p}(Y^{-\top})\|_F \\ &\stackrel{(c)}{\leq} \|\text{OffBlkdiag}_{\tau_p}(\Gamma^{\top})\| \|Y^{-\top}\| + \frac{\sqrt{\sum_j \|r_{jj}\|^2}}{\omega_{\text{ir}}} \|\text{OffBlkdiag}_{\tau_p}(Y^{-\top})\|_F, \end{aligned}$$

where (a) uses the definition of  $\gamma_j$ , (b) uses (47) and (53), (c) uses (50). Therefore,

$$\begin{aligned} \|\text{OffBlkdiag}_{\tau_p}(Y^{-\top})\|_F &\leq \frac{\|R\|_F}{g_2} \\ &\leq \frac{1}{g_2} \left( \|\text{OffBlkdiag}_{\tau_p}(\Gamma^{\top})\|_F \|Y^{-\top}\| + \frac{\sqrt{\sum_j \|r_{jj}\|^2}}{\omega_{\text{ir}}} \|\text{OffBlkdiag}_{\tau_p}(Y^{-\top})\|_F \right), \end{aligned}$$

and hence

$$\|\text{OffBlkdiag}_{\tau_p}(Y^{-\top})\|_F \leq \frac{\|\text{OffBlkdiag}_{\tau_p}(\Gamma^{\top})\|_F \|Y^{-\top}\|}{g_2 - \frac{\sqrt{\sum_j \|r_{jj}\|^2}}{\omega_{\text{ir}}}} \leq \frac{\frac{r}{\omega_{\text{neq}}} \|Y^{-1}\|}{g_2 - \frac{r}{\omega_{\text{ir}}}}, \quad (55)$$

where the last inequality uses (50) and (51).

Finally, by calculations, we have

$$\begin{aligned}
 \widehat{A} &= \widetilde{V}_1 \widehat{Z} = (V_1 T_c + V_2 T_s) \widehat{Z} = (V_1 T_c^{-\top} (I - T_s^\top T_s) + V_2 T_s) \widehat{Z} \\
 &= V_1 T_c^{-\top} Z Y^{-\top} + (-V_1 T_c^{-\top} (T_s^\top T_s) + V_2 T_s) \widehat{Z} \\
 &= A Y^{-\top} + (-V_1 T_c^{-\top} (T_s^\top T_s) + V_2 T_s) \widehat{Z} \\
 &= A \text{diag}(Y_{11}, \dots, Y_{\ell\ell}) + A \text{OffBlkdiag}_{\tau_p}(Y^{-\top}) + (-V_1 T_c^{-\top} (T_s^\top T_s) + V_2 T_s) \widehat{Z},
 \end{aligned}$$

and it follows that

$$\begin{aligned}
 \|\widehat{A} - A \text{diag}(Y_{11}, \dots, Y_{\ell\ell})\|_F &\leq \|A\| \|\text{OffBlkdiag}_{\tau_p}(Y^{-\top})\|_F + (\|T_c^{-\top} T_s^\top T_s\| + \|T_s\|) \|\widehat{Z}\|_F \\
 &\leq \|A\| \frac{\frac{r}{\omega_{\text{neq}}} \|Y^{-\top}\|}{g_2 - \frac{r}{\omega_{\text{ir}}}} + \left( \frac{\epsilon^2}{\sqrt{1 - \epsilon^2}} + \epsilon \right) \|\widehat{A}\|_F.
 \end{aligned}$$

The proof is completed. □
